# Supplementary material for: In vivo silencing of amphiregulin by a novel effective Self-Assembled-Micelle inhibitory RNA ameliorates renal fibrosis via inhibition of EGFR signals
Source: PubMed Central journal article supplement (PMC7838194; doi:10.1038/s41598-021-81726-2), 2021-01-26

***In vivo* silencing of amphiregulin by a novel effective Self-Assembled-Micelle inhibitory RNA ameliorates renal fibrosis via inhibition of EGFR signals**

Seung Seob Son<sup>1,7</sup>, Soohyun Hwang<sup>1,7</sup>, Jun Hong Park<sup>1</sup>, Youngho Ko<sup>1</sup>, Sung-Il Yun<sup>2</sup>, Ji-Hye Lee<sup>3</sup>, Beomseok Son<sup>1</sup>, Tae Rim Kim<sup>1</sup>, Han-Oh Park<sup>1,2\*</sup>, and Eun Young Lee<sup>4,5,6\*</sup>

<sup>1</sup>siRNAgen Therapeutics, Daejeon 34302, Republic of Korea; <sup>2</sup>Bioneer Corporation, Daejeon 34302, Republic of Korea; <sup>3</sup>Department of Pathology, Soonchunhyang University Cheonan Hospital, Cheonan 31151, Republic of Korea; <sup>4</sup>Department of Internal Medicine, Soonchunhyang University Cheonan Hospital, Cheonan 31151, Republic of Korea; <sup>5</sup>Institute of Tissue Regeneration, College of Medicine, Soonchunhyang University, Cheonan 31151, Republic of Korea; <sup>6</sup>BK21 FOUR Project, College of Medicine, Soonchunhyang University, Cheonan 31151, Republic of Korea; <sup>7</sup>These authors contributed equally: Seung Seob Son and Soohyun Hwang.

**Correspondence:** Eun Young Lee, Department of Internal Medicine, Soonchunhyang University Cheonan Hospital, 31 Soonchunhyang 6-gil, Cheonan 31151, Republic of Korea, Tel: +82-41-570-3684, Fax: +82-41-570-2958, E-mail: eylee@schmc.ac.kr

Han-Oh Park, Bioneer Corporation and siRNAgen Therapeutics, 8-11 Munpyeongseo-ro, Daedeok-gu, Daejeon 34302, Republic of Korea, Tel: +82-42-930-8500, Fax: +82-42-930-8600, E-mail: hpark@bioneer.com

## Supplementary Figure S1

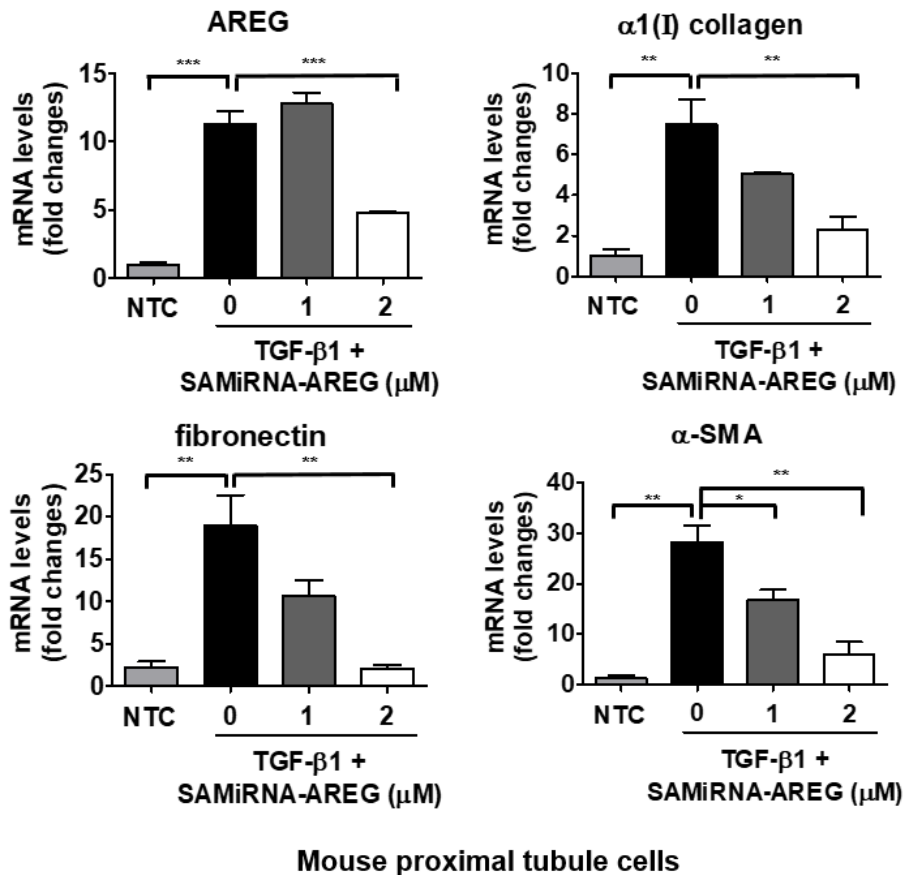

**Supplementary Figure S1. SAMiRNA-AREG ameliorated the fibrosis-related mRNA levels during TGF- $\beta$ 1 induction *in vitro*.** mProx24 mouse proximal tubule cells were stimulated with or without TGF- $\beta$ 1 (10 ng/mL) for 24 h and co-treated with SAMiRNA-AREG at 1  $\mu$ M or 2  $\mu$ M for 24 h. The mRNA expression of AREG,  $\alpha$ 1(I) collagen, fibronectin, and  $\alpha$ -SMA is shown using RPL13A as a reference gene. (mean  $\pm$  SEM). \*  $p < 0.05$ , \*\*  $p < 0.01$ , \*\*\*  $p < 0.001$  compared to TGF- $\beta$ 1-treated cells by ANOVA with the Newman-Keuls post-hoc test.

## Supplementary Figure S2

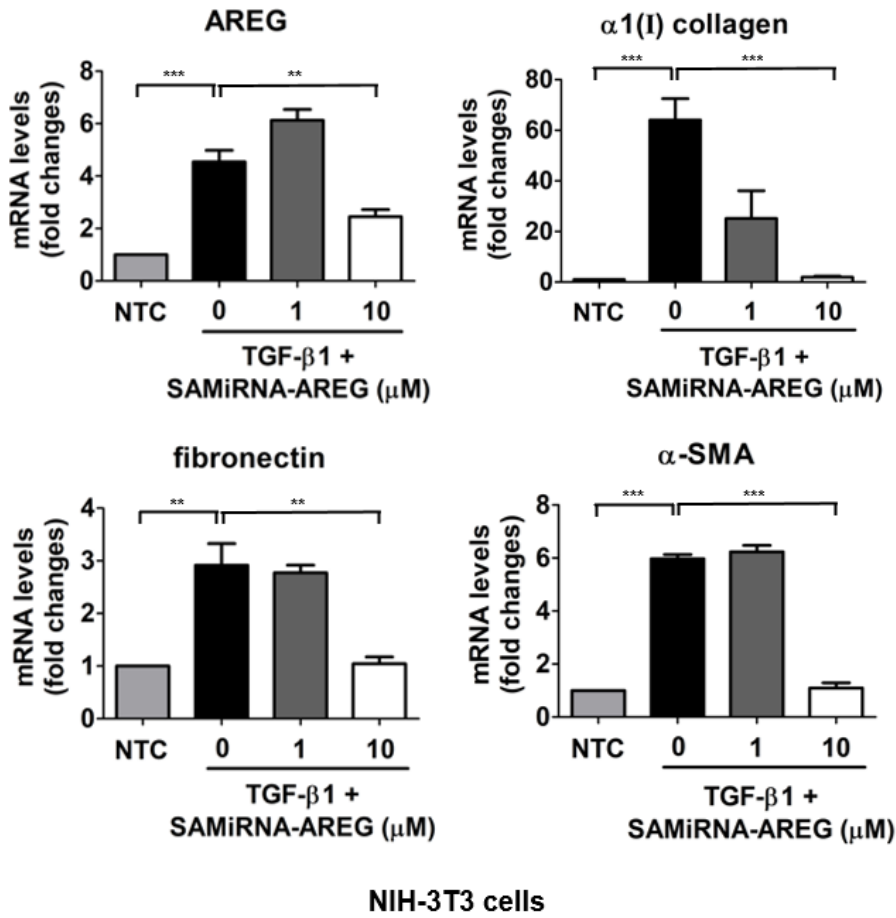

Supplementary Figure S2. SAMiRNA-AREG downregulated fibrosis-related mRNA levels induced by TGF- $\beta 1$  in NIH-3T3 fibroblasts. NIH-3T3 mouse fibroblasts were stimulated with or without TGF- $\beta 1$  (10 ng/mL) for 24 h and co-treated with SAMiRNA-AREG at 1  $\mu$ M or 10  $\mu$ M for 24 h. The mRNA expression of AREG,  $\alpha 1(I)$  collagen, fibronectin, and  $\alpha$ -SMA is shown using RPL13A as a reference gene. (mean  $\pm$  SEM). \*\* p < 0.01, \*\*\* p < 0.001 compared to TGF- $\beta 1$ -treated cells by ANOVA with the Newman-Keuls post-hoc test.

### Supplementary Figure S3

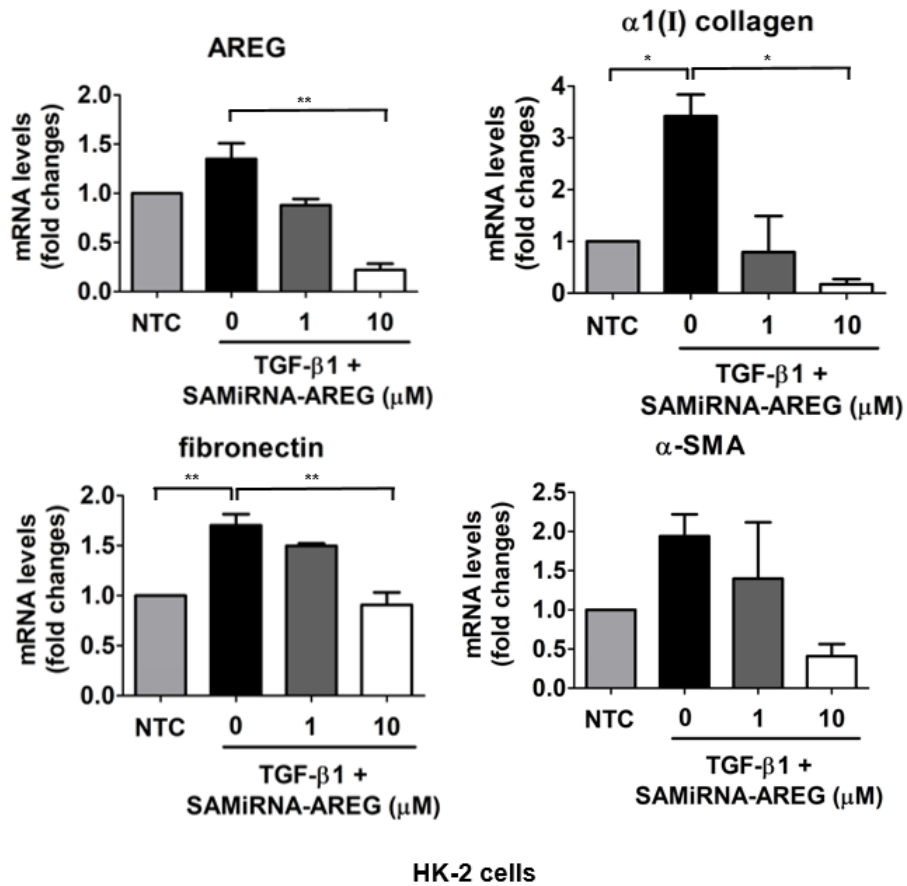

**Supplementary Figure S3. SAMiRNA-AREG downregulated fibrosis-related mRNA levels induced by TGF-β1 in HK-2 human proximal tubule cells.** HK-2 cells were stimulated with or without TGF-β1 (10 ng/mL) for 24 h and co-treated with SAMiRNA-AREG at 1 μM or 10 μM for 24 h. The mRNA expression of AREG, α1(I) collagen, fibronectin, and α-SMA is shown using GAPDH as a reference gene. (mean ± SEM). \* p < 0.05, \*\* p < 0.01 compared to TGF-β1-treated cells by ANOVA with the Newman-Keuls post-hoc test.

**Supplementary Table S1. Analysis of renal function in UUO- or AD-treated mice.**

Abbreviations: BW, body weight; BUN, blood urea nitrogen; Cr, serum creatinine. \*  $p < 0.05$ ,

\*\*  $p < 0.01$ , \*\*\*  $p < 0.001$  compared to controls. Values are expressed as the mean  $\pm$  SEM.

|             | <b>Sham</b>      | <b>UUO</b>       |
|-------------|------------------|------------------|
| BW (g)      | 24.80 $\pm$ 0.79 | 24.49 $\pm$ 0.73 |
| BUN (mg/dl) | 21.1 $\pm$ 1.07  | 24.9 $\pm$ 1.88  |
| Cr (mg/dl)  | 0.07 $\pm$ 0.01  | 0.11 $\pm$ 0.02  |

  

|             | <b>Control</b>   | <b>AD</b>           |
|-------------|------------------|---------------------|
| BW (g)      | 22.26 $\pm$ 0.02 | 17.26 $\pm$ 0.72*** |
| BUN (mg/dl) | 17.95 $\pm$ 0.06 | 89.37 $\pm$ 35.08** |
| Cr (mg/dl)  | 0.14 $\pm$ 0.01  | 0.48 $\pm$ 0.21*    |

**Supplementary Table S2. Sequences of primers used for real-time qRT-PCR**

| <b>Gene</b>              | <b>Species</b> |         | <b>Sequence</b>        |
|--------------------------|----------------|---------|------------------------|
| RPL13A                   | Mouse          | Forward | CGATAGTGCATCTTGGCCTTT  |
|                          |                | Reverse | CCTGCTGCTCTCAAGGTTGTT  |
| AREG                     | Mouse          | Forward | GAGGCTTCGACAAGAAAACG   |
|                          |                | Reverse | ACCAATGTCATTTCCGGTGT   |
| fibronectin              | Mouse          | Forward | TGGTGGCCACTAAATACGAA   |
|                          |                | Reverse | GGAGGGCTAACATTCTCCAG   |
| $\alpha$ -SMA            | Mouse          | Forward | GGCTCTGGGCTCTGTAAGG    |
|                          |                | Reverse | CTCTTGCTCTGGGCTTCATC   |
| $\alpha$ 1(I) collagen   | Mouse          | Forward | TCATCGTGGCTTCTCTGGTC   |
|                          |                | Reverse | GACCGTTGAGTCCGTCTTTG   |
| $\alpha$ 1(III) collagen | Mouse          | Forward | TCACCAGGACAAAGAGGGGA   |
|                          |                | Reverse | CCACCAGGACTGCCGTTATT   |
| VCAM-1                   | Mouse          | Forward | ACGAGGCTGGAATTAGCAGA   |
|                          |                | Reverse | TTCGGGCACATTTCCACAAG   |
| ICAM-1                   | Mouse          | Forward | GTGCTTTGAGAACTGTGGCA   |
|                          |                | Reverse | GGTGAGGTCCTTGCCCTACTT  |
| TNF- $\alpha$            | Mouse          | Forward | CCTGTAGCCCACGTCGTAG    |
|                          |                | Reverse | GGGAGTAGACAAGGTACAACCC |
| MCP-1                    | Mouse          | Forward | AACTGCATCTGCCCTAAGGT   |
|                          |                | Reverse | CTGTCACACTGGTCACTCCT   |
| AREG                     | Human          | Forward | ACACCTACTCTGGGAAGCGT   |
|                          |                | Reverse | GCCAGGTATTTGTGGTTCGT   |
| $\alpha$ 1(I) collagen   | Human          | Forward | CCTGGCCCCATTGGTAATGTT  |
|                          |                | Reverse | CCCCCTCACGTCCAGATTCAC  |
| fibronectin              | Human          | Forward | CAAGCCAGATGTCAGAAGC    |
|                          |                | Reverse | GGATGGTGCATCAATGGCA    |

|               |       |         |                         |
|---------------|-------|---------|-------------------------|
| $\alpha$ -SMA | Human | Forward | GATCTGGCACC ACTCTTTCTAC |
|               |       | Reverse | CAGGCAACTCGTAACTCTTCTC  |
| GAPDH         | Human | Forward | ATCAAGAAGGTGGTGAAGCAG   |
|               |       | Reverse | GTCGCTGTTGAAGTCAGAGG    |

---

## Supplementary Materials and Methods

### SAMiRNA synthesis and manufacture<sup>23</sup>

#### 1) Preparation of C18-6 Disulfide Phosphoramidite

To bond C18-6 disulfide to a double-helix oligo RNA structure, C18-6 disulfide phosphoramidite was prepared as shown in the following reaction scheme 1.

##### Reaction scheme 1

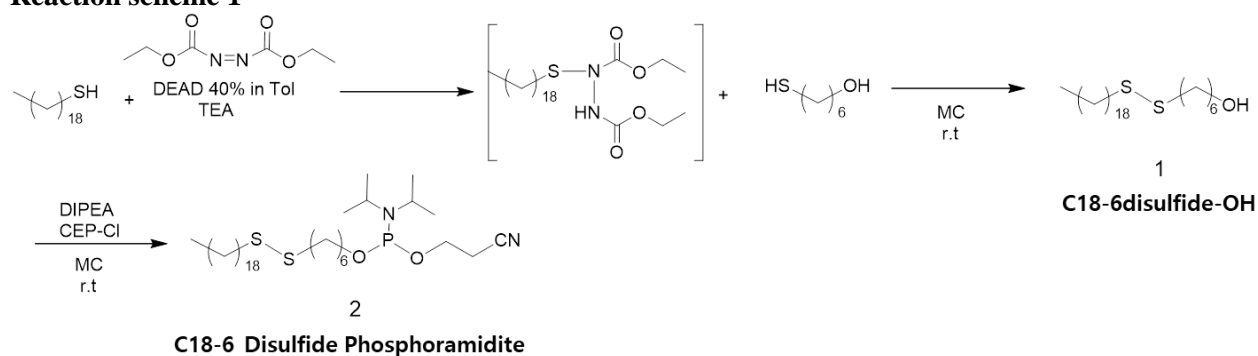

#### 2) Preparation of Atom 18 Spacer Phosphoramidite

To bond an Atom 18 Spacer to a double-helix oligo RNA structure, Atom 18 Spacer phosphoramidite was prepared as shown in the following reaction scheme 2.

##### Reaction scheme 2

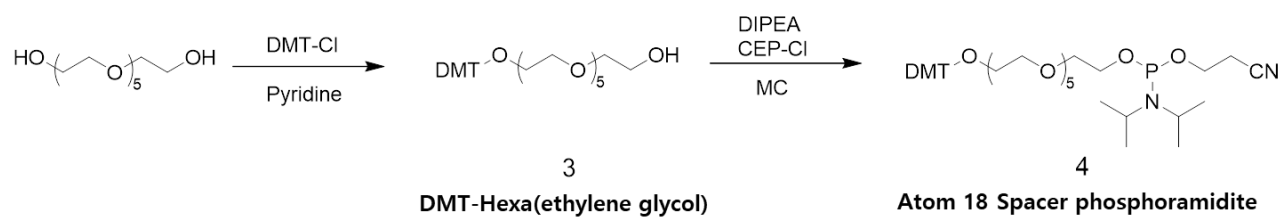

Supplement: 41598_2021_81726_MOESM1_ESM.pdf [file 41598_2021_81726_MOESM1_ESM.pdf]
